# Supplementary material for: Choice of assembly software has a critical impact on virome characterisation
Source: PubMed Central journal article supplement (PMC6350398; doi:10.1186/s40168-019-0626-5), 2019-01-28

**(A) MCA genome fraction**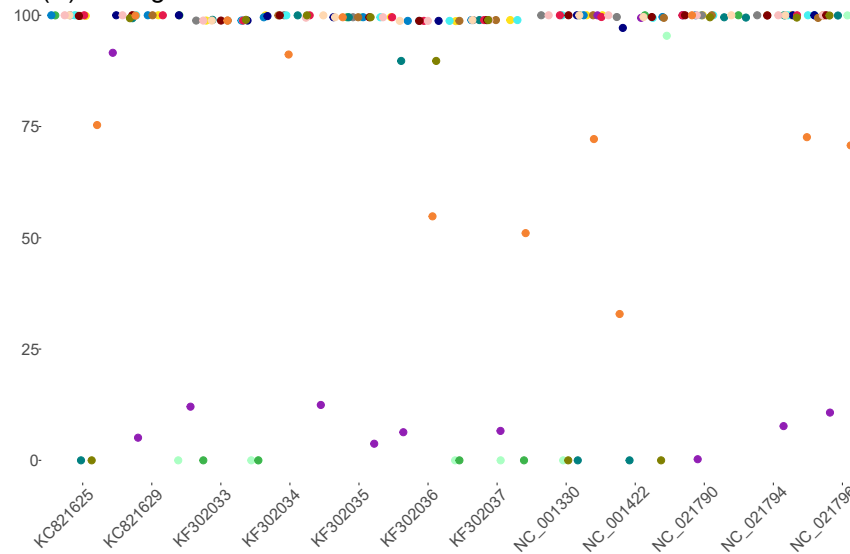**(C) MCA indels per 100kb**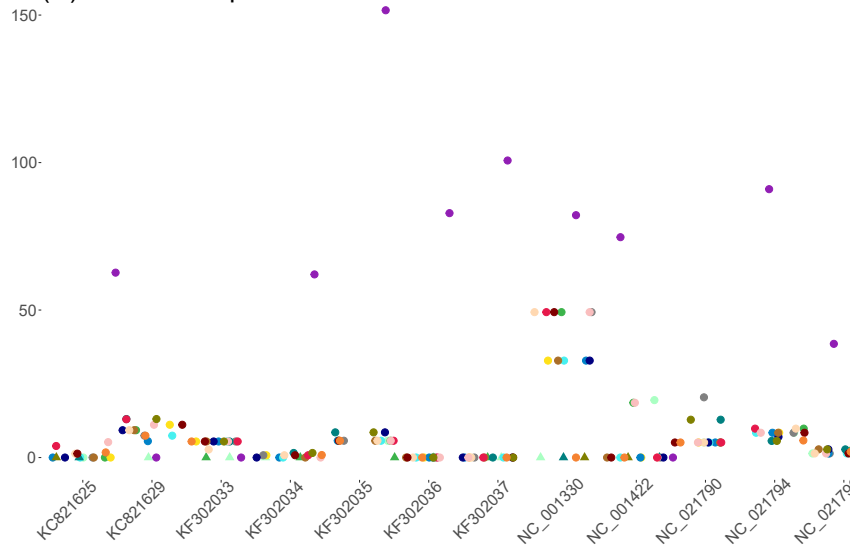**(E) MCA Mismatch per 100kb**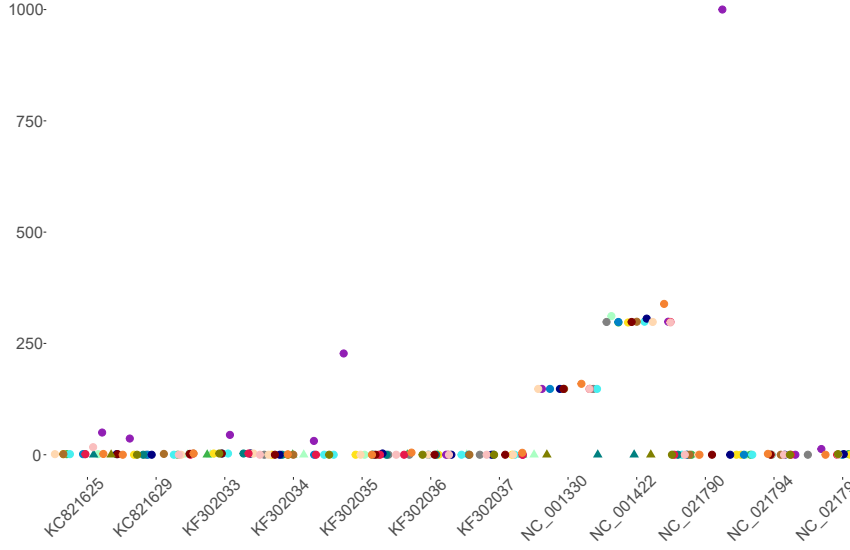**(B) MCB genome fraction**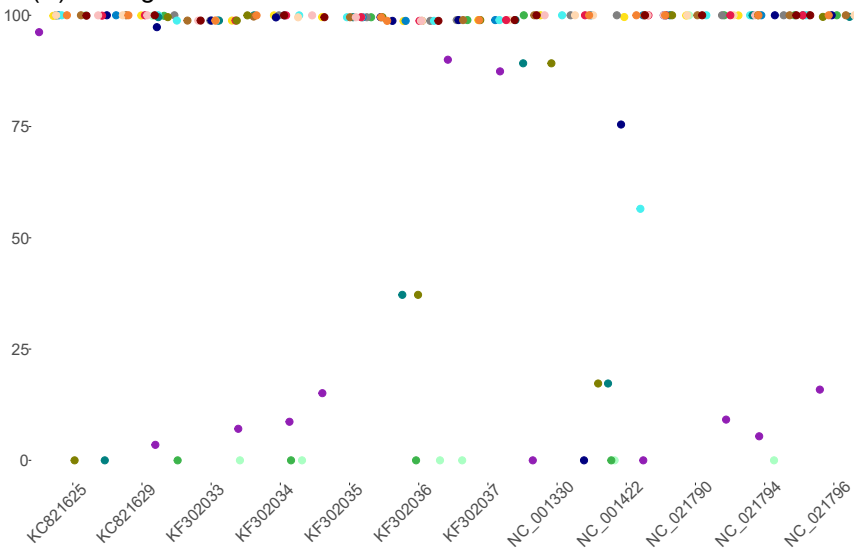**(D) MCB indels per 100 kb**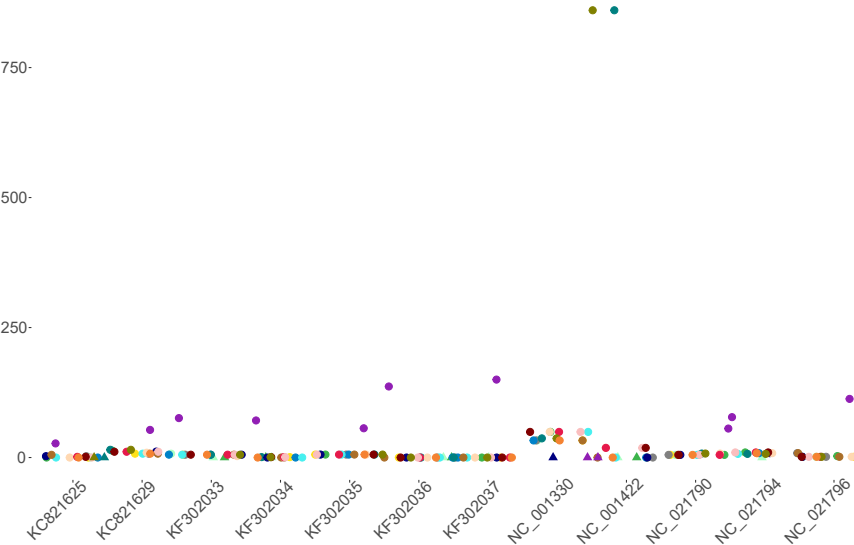**(F) MCB Mismatch per 100kb**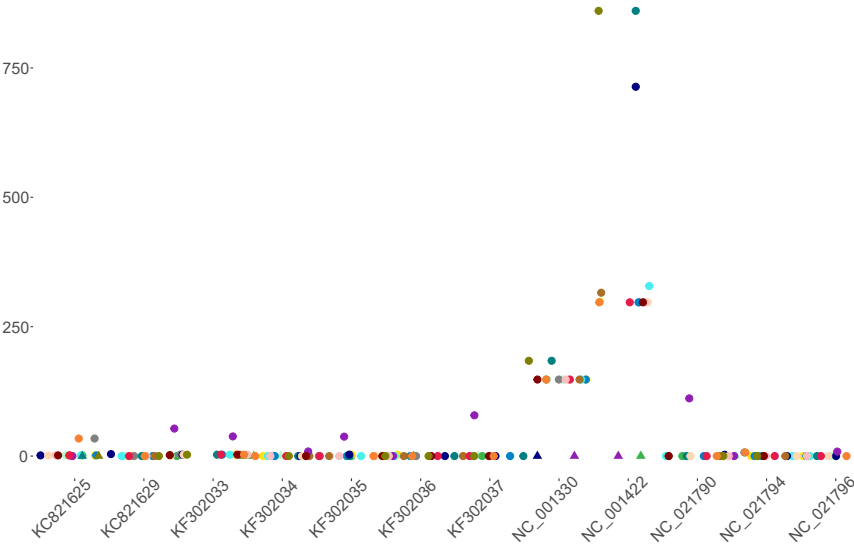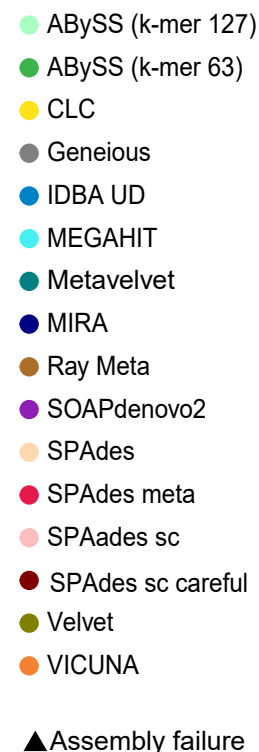

Supplement: 40168_2019_626_MOESM6_ESM.pdf [file 40168_2019_626_MOESM6_ESM.pdf]
